# Supplementary material for: Sawhorse-type ruthenium complexes with triazolopyrimidine ligands – what do they represent in terms of cytotoxic and CORM compounds?
Source: Royal Society of Chemistry journal article supplement (doi:10.1039/d1dt04294g), 2022-01-01
Supplement: d1dt04294g1.pdf [file d1dt04294g1.pdf]

## Supporting Information

# Sawhorse-type ruthenium complexes with triazolopyrimidine ligands - what do they represent in terms of cytotoxic and CORM compounds?

Marzena Fandzloch,<sup>\*a</sup> Tomasz Jędrzejewski,<sup>b</sup> Joanna Wiśniewska,<sup>c</sup> Jerzy Sitkowski,<sup>d,e</sup>  
Liliana Dobrzańska,<sup>c</sup> Anna A. Brożyna<sup>f</sup> and Sylwia Wrotek<sup>b</sup>

<sup>a</sup> Institute of Low Temperature and Structure Research, Polish Academy of Sciences, Okólna 2, 50-422 Wrocław, Poland

<sup>b</sup> Department of Immunology, Faculty of Biological and Veterinary Sciences, Nicolaus Copernicus University in Toruń, Lwowska 1, 87-100 Toruń, Poland

<sup>c</sup> Faculty of Chemistry, Nicolaus Copernicus University in Toruń, Gagarina 7, 87-100 Toruń, Poland.

<sup>d</sup> National Institutes of Medicines, Chełmska 30/34, 00-725 Warszawa, Poland

<sup>e</sup> Institute of Organic Chemistry, Polish Academy of Sciences, Kasprzaka 44/52, 01-224 Warszawa, Poland

<sup>f</sup> Department of Human Biology, Faculty of Biological and Veterinary Sciences, Nicolaus Copernicus University in Toruń, Lwowska 1, 87-100 Toruń, Poland

\*Corresponding author e-mail:

m.fandzloch@intibs.pl

## Table of Contents

|               |    |
|---------------|----|
| Fig. S1.....  | 4  |
| Fig. S2.....  | 4  |
| Fig. S3.....  | 5  |
| Fig. S4.....  | 6  |
| Fig. S5.....  | 6  |
| Fig. S6.....  | 7  |
| Fig. S7.....  | 7  |
| Fig. S8.....  | 8  |
| Fig. S9.....  | 8  |
| Fig. S10..... | 9  |
| Fig. S11..... | 9  |
| Fig. S12..... | 10 |
| Fig. S13..... | 10 |
| Fig. S14..... | 11 |
| Fig. S15..... | 11 |
| Fig. S16..... | 12 |
| Fig. S17..... | 13 |
| Fig. S18..... | 13 |
| Fig. S19..... | 14 |
| Fig. S20..... | 14 |
| Fig. S21..... | 15 |
| Fig. S22..... | 15 |
| Fig. S23..... | 16 |
| Fig. S24..... | 16 |
| Fig. S25..... | 17 |
| Fig. S26..... | 17 |
| Fig. S27..... | 18 |
| Fig. S28..... | 18 |
| Fig. S29..... | 19 |
| Fig. S30..... | 19 |
| Fig. S31..... | 20 |

|               |    |
|---------------|----|
| Fig. S32..... | 20 |
| Fig. S33..... | 21 |
| Fig. S34..... | 21 |
| Fig. S35..... | 22 |
| Fig. S36..... | 22 |
| Fig. S37..... | 23 |
| Fig. S38..... | 23 |

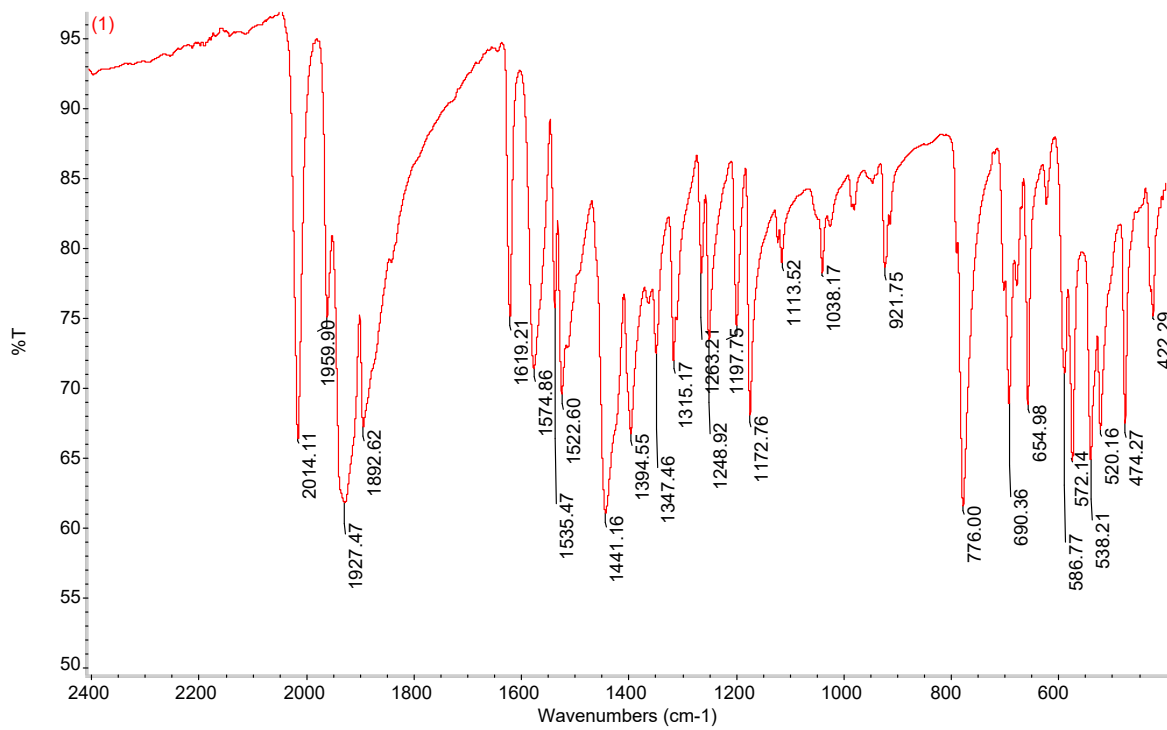

**Fig. S1** FT-IR spectrum of  $[\text{Ru}_2(\text{CO})_4(\mu\text{-OOCCH}_3)_2(\text{tp})_2]$  (1).

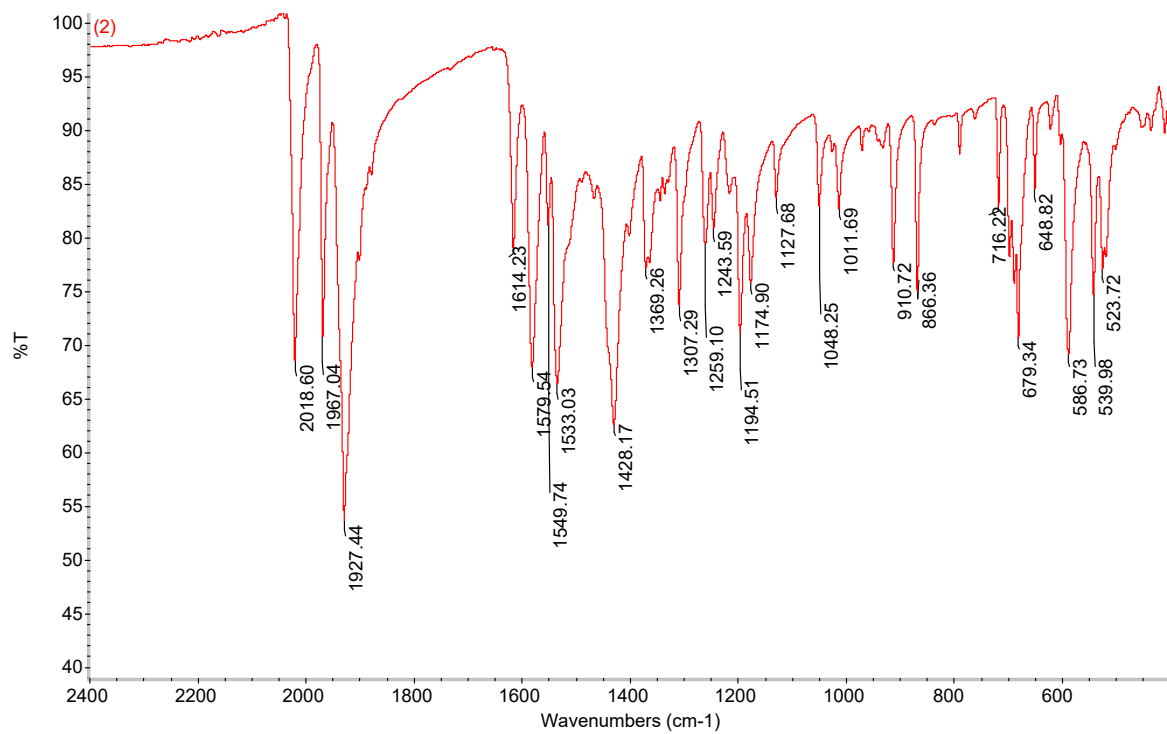

**Fig. S2** FT-IR spectrum of  $[\text{Ru}_2(\text{CO})_4(\mu\text{-OOCCH}_3)_2(\text{dbtp})_2]$  (2).

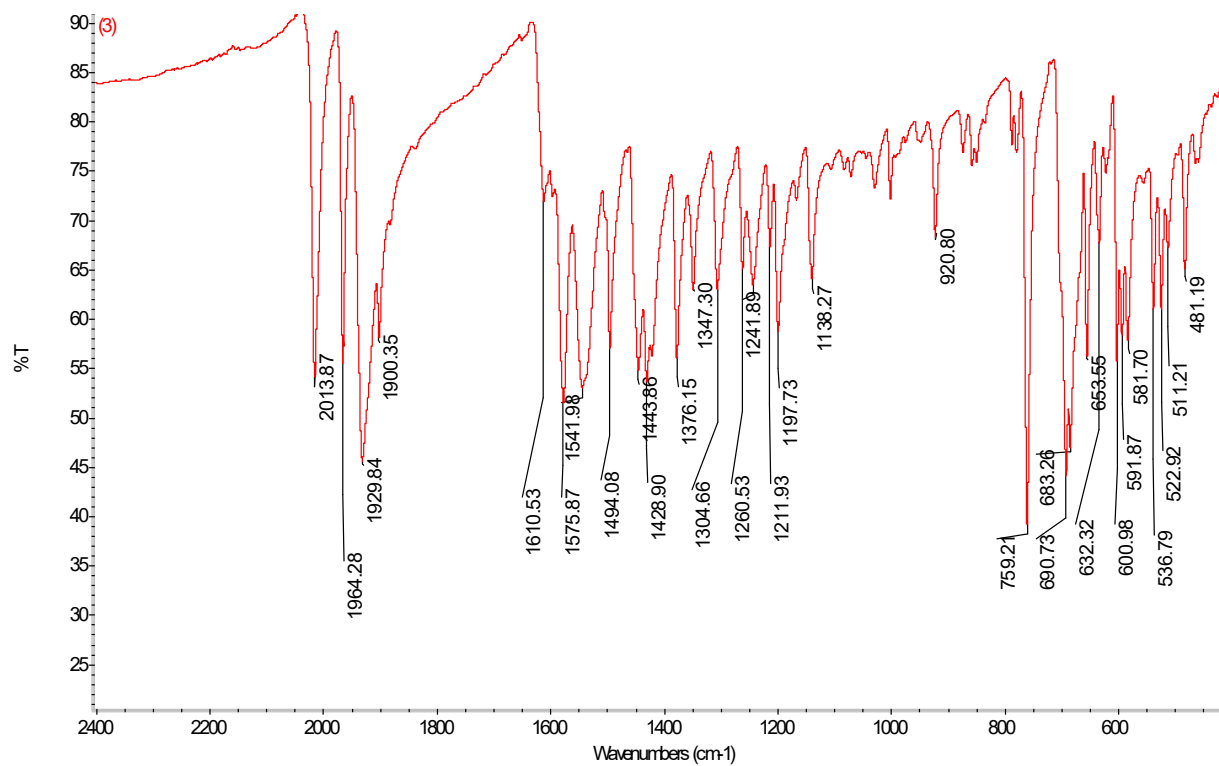

**Fig. S3** FT-IR spectrum of [Ru<sub>2</sub>(CO)<sub>4</sub>(μ-OOCCH<sub>3</sub>)<sub>2</sub>(dtp)<sub>2</sub>] (3).

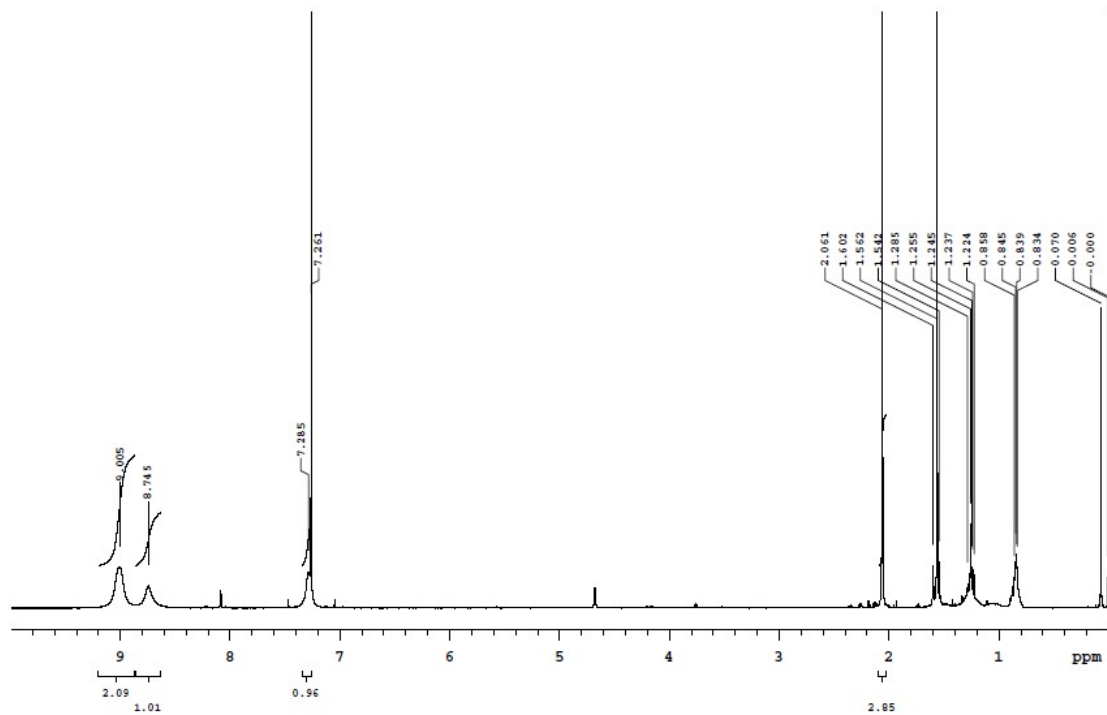

Fig. S4  $^1\text{H}$  NMR spectrum of  $[\text{Ru}_2(\text{CO})_4(\mu\text{-OOCCH}_3)_2(\text{tp})_2]$  (**1**) in  $\text{CDCl}_3$ .

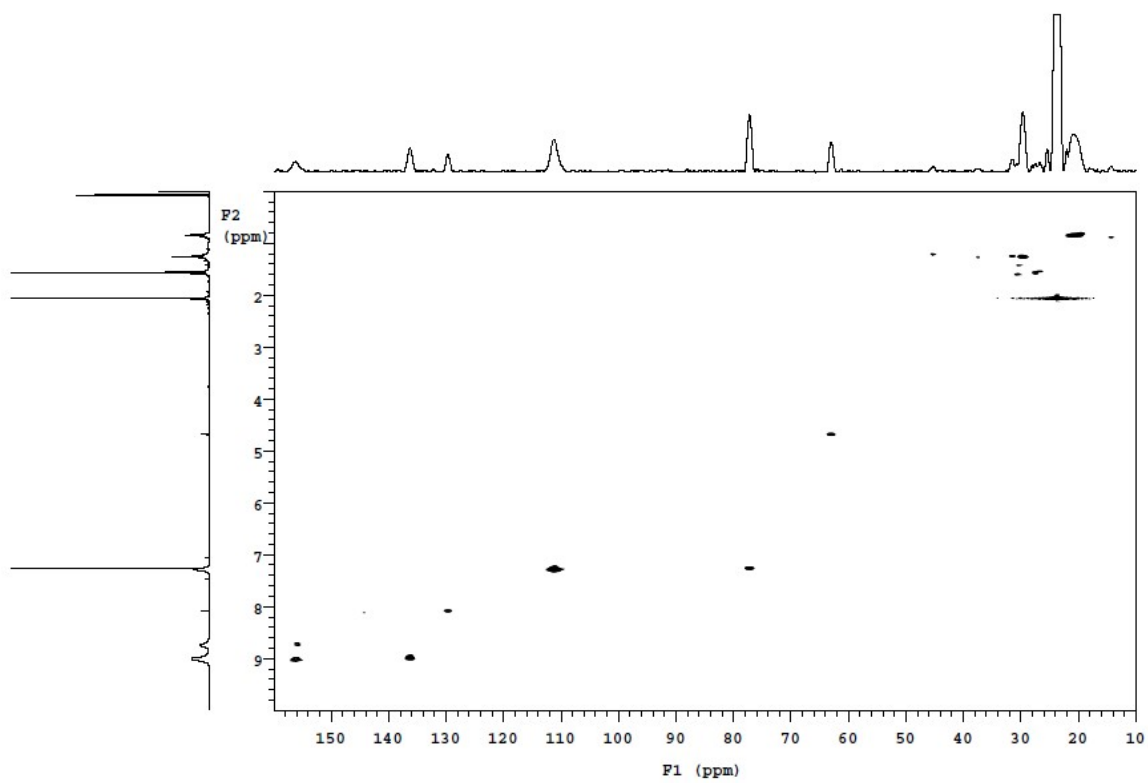

Fig. S5  $^1\text{H}$ - $^{13}\text{C}$  HMBC spectrum of  $[\text{Ru}_2(\text{CO})_4(\mu\text{-OOCCH}_3)_2(\text{tp})_2]$  (**1**) in  $\text{CDCl}_3$ .

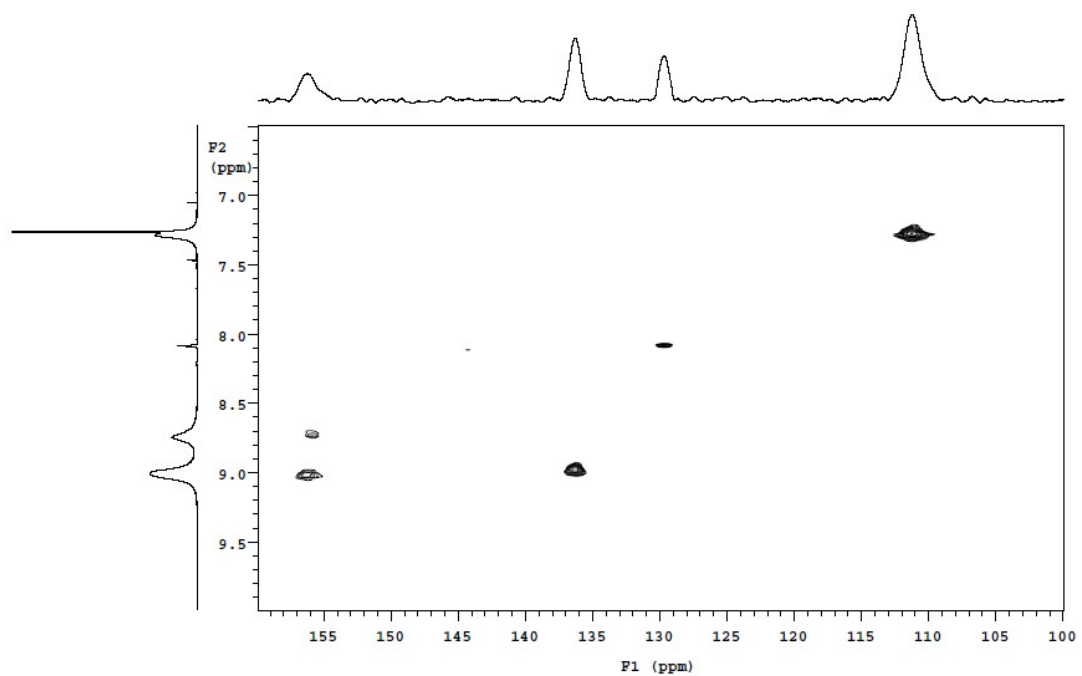

**Fig. S6** Selected range of  $^1\text{H}$ - $^{13}\text{C}$  HMBC spectrum of  $[\text{Ru}_2(\text{CO})_4(\mu\text{-OOCCH}_3)_2(\text{tp})_2]$  (**1**) in  $\text{CDCl}_3$ .

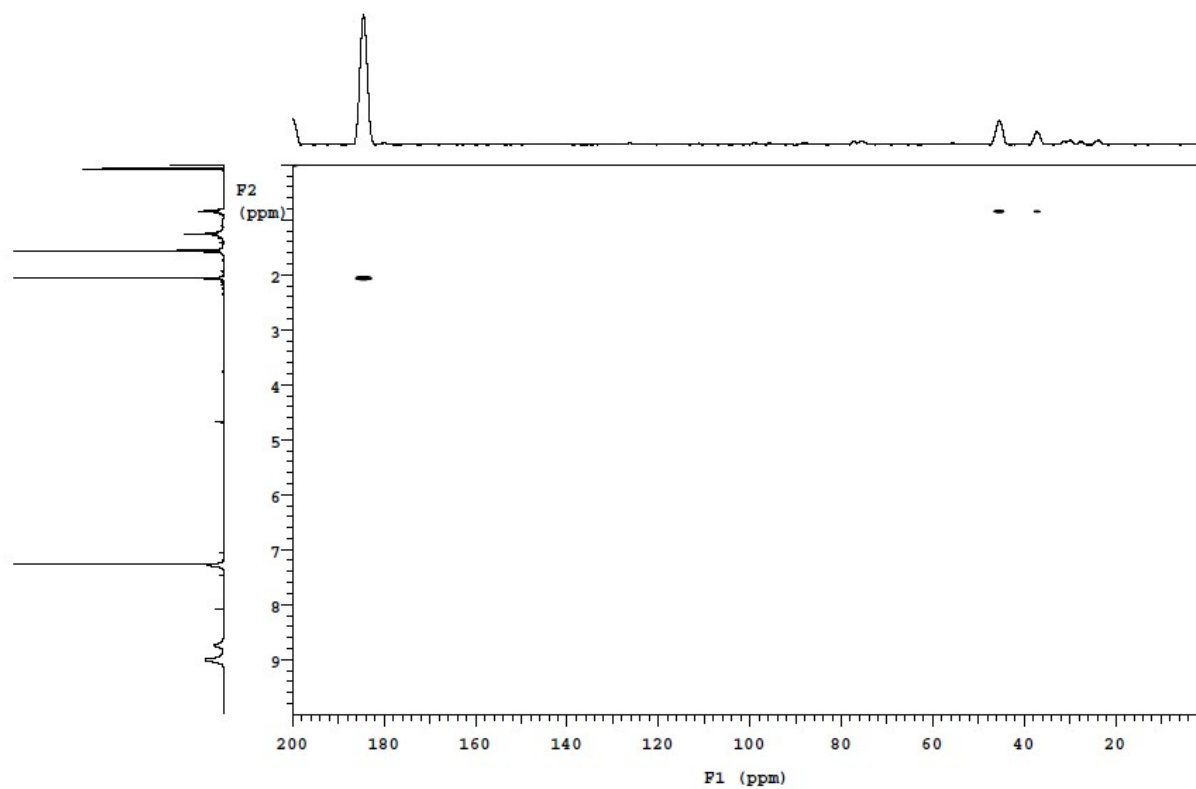

**Fig. S7**  $^1\text{H}$ - $^{13}\text{C}$  HMBC spectrum of  $[\text{Ru}_2(\text{CO})_4(\mu\text{-OOCCH}_3)_2(\text{tp})_2]$  (**1**) in  $\text{CDCl}_3$ .

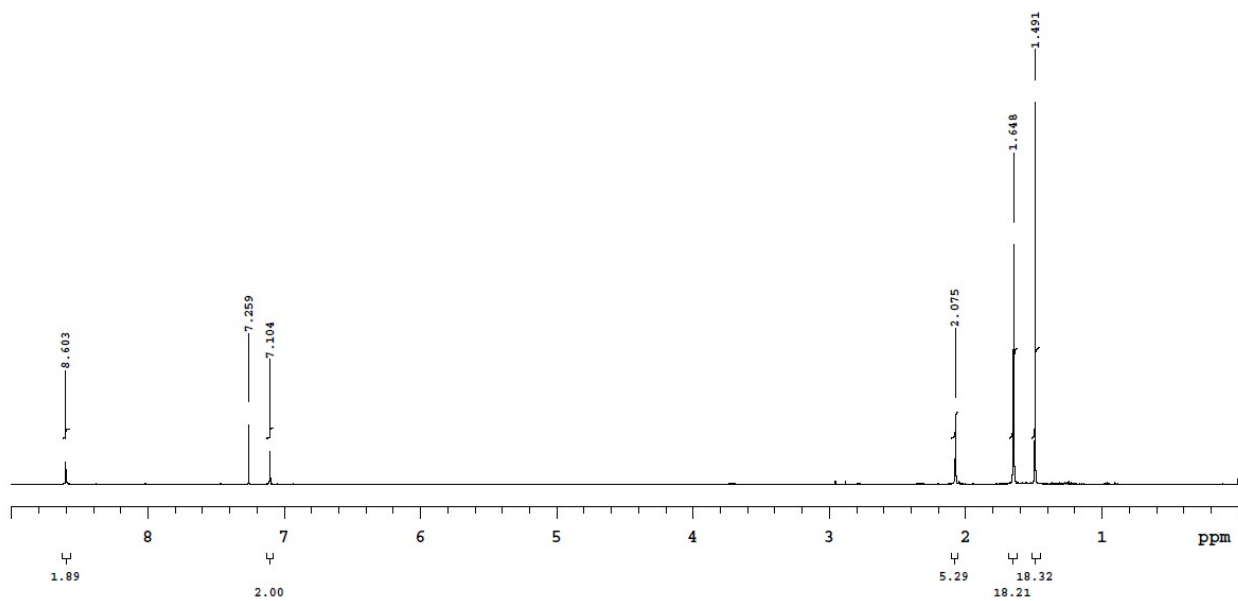

**Fig. S8**  $^1\text{H}$  NMR spectrum of  $[\text{Ru}_2(\text{CO})_4(\mu\text{-OOCCH}_3)_2(\text{dbtp})_2]$  (**2**) in  $\text{CDCl}_3$ .

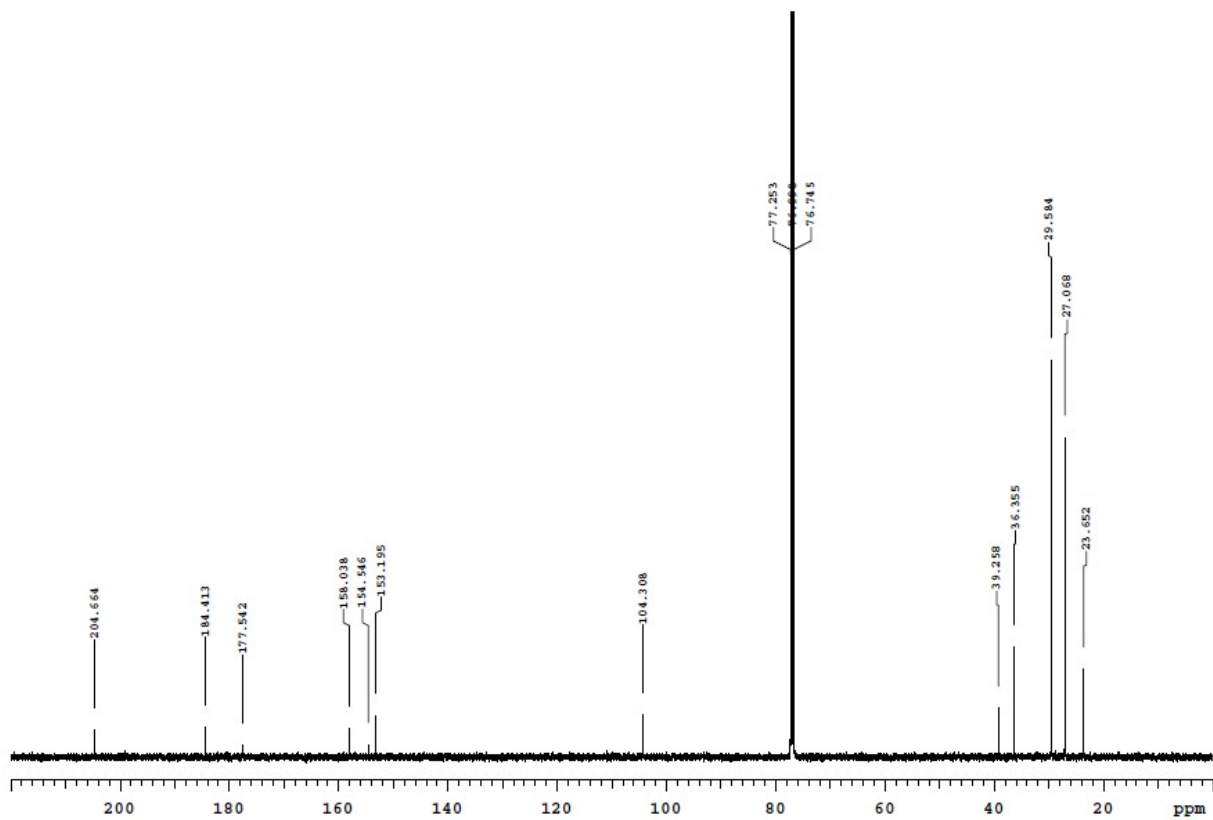

**Fig. S9**  $^{13}\text{C}$  NMR spectrum of  $[\text{Ru}_2(\text{CO})_4(\mu\text{-OOCCH}_3)_2(\text{dbtp})_2]$  (**2**) in  $\text{CDCl}_3$ .



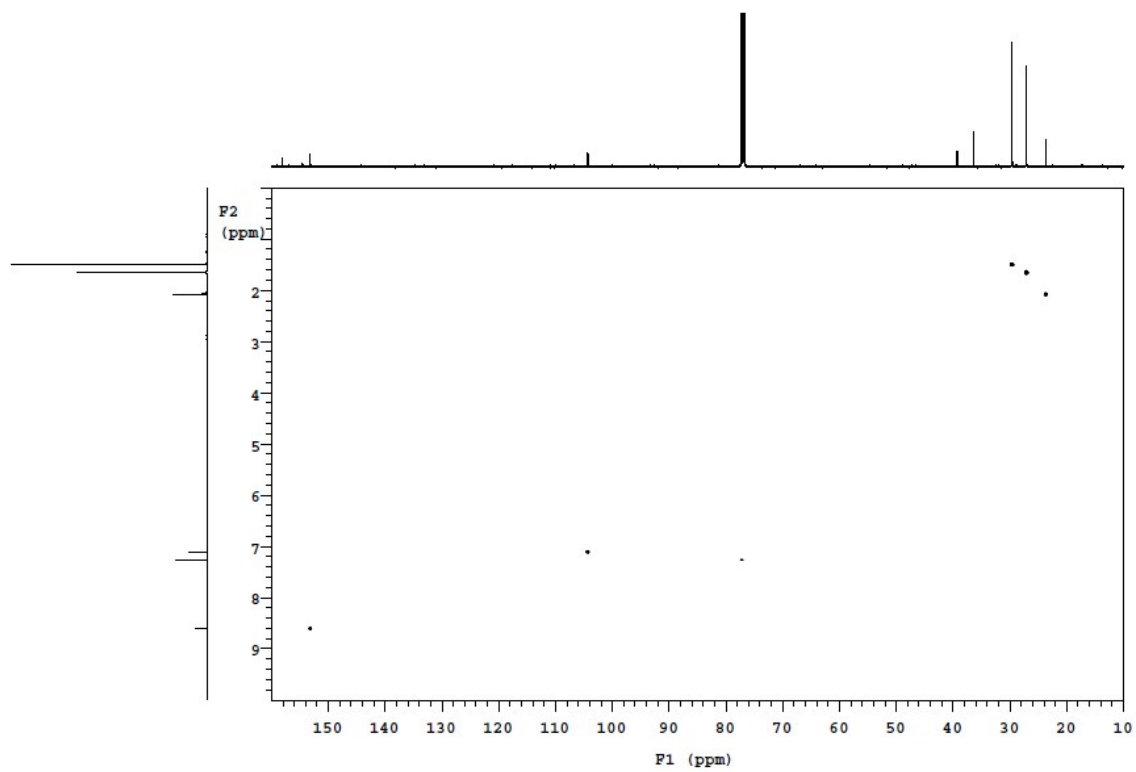

**Fig. S10**  $^1\text{H}$ - $^{13}\text{C}$  HSQC spectrum of  $[\text{Ru}_2(\text{CO})_4(\mu\text{-OOCCH}_3)_2(\text{dbtp})_2]$  (**2**) in  $\text{CDCl}_3$ .

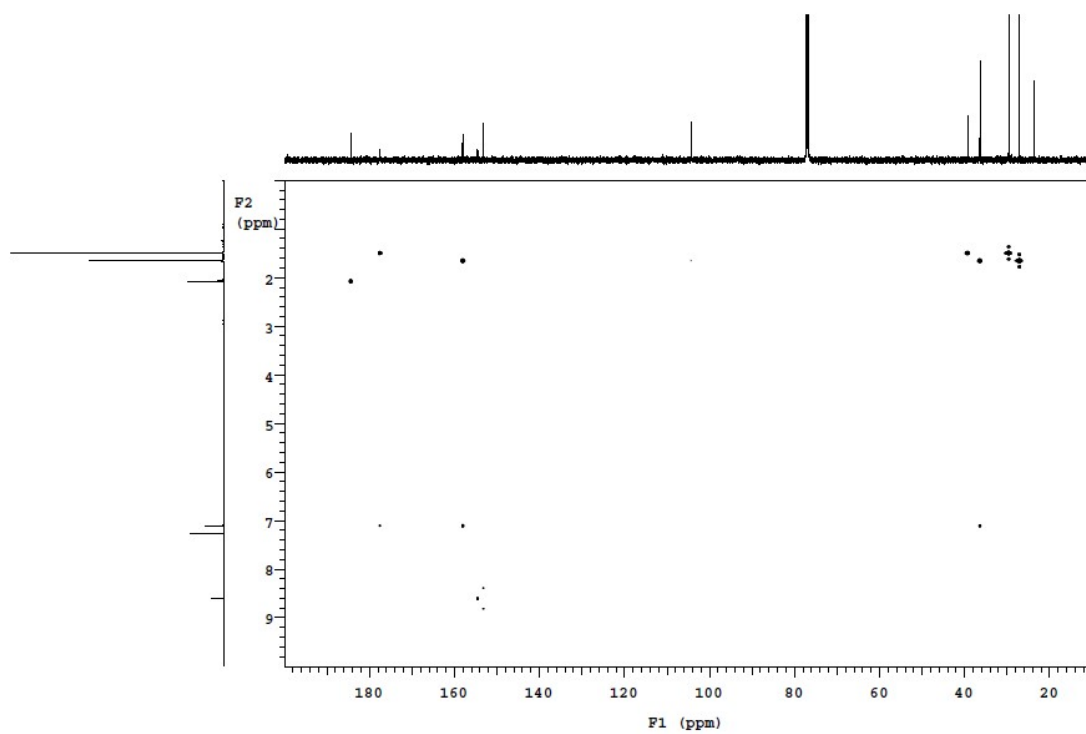

**Fig. S11**  $^1\text{H}$ - $^{13}\text{C}$  HMBC spectrum of  $[\text{Ru}_2(\text{CO})_4(\mu\text{-OOCCH}_3)_2(\text{dbtp})_2]$  (**2**) in  $\text{CDCl}_3$ .

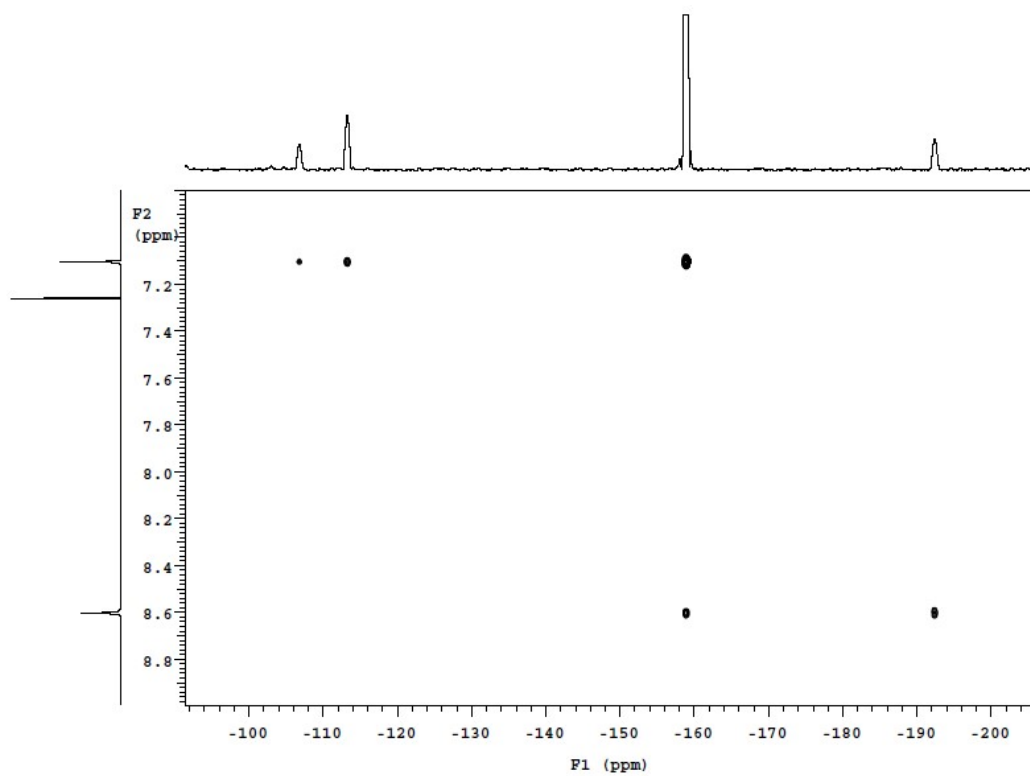

**Fig. S12**  $^1\text{H}$ - $^{13}\text{C}$  HMQC spectrum of  $[\text{Ru}_2(\text{CO})_4(\mu\text{-OOCCH}_3)_2(\text{dbtp})_2]$  (**2**) in  $\text{CDCl}_3$ .

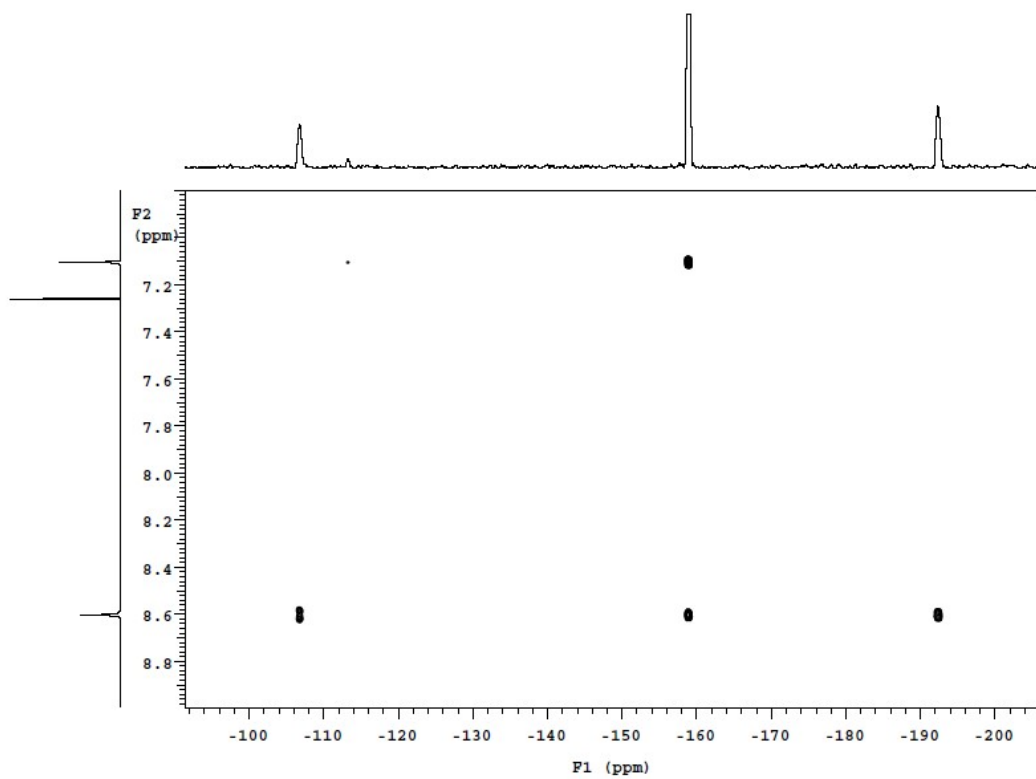

**Fig. S13**  $^1\text{H}$ - $^{13}\text{C}$  HMQC spectrum of  $[\text{Ru}_2(\text{CO})_4(\mu\text{-OOCCH}_3)_2(\text{dbtp})_2]$  (**2**) in  $\text{CDCl}_3$ .

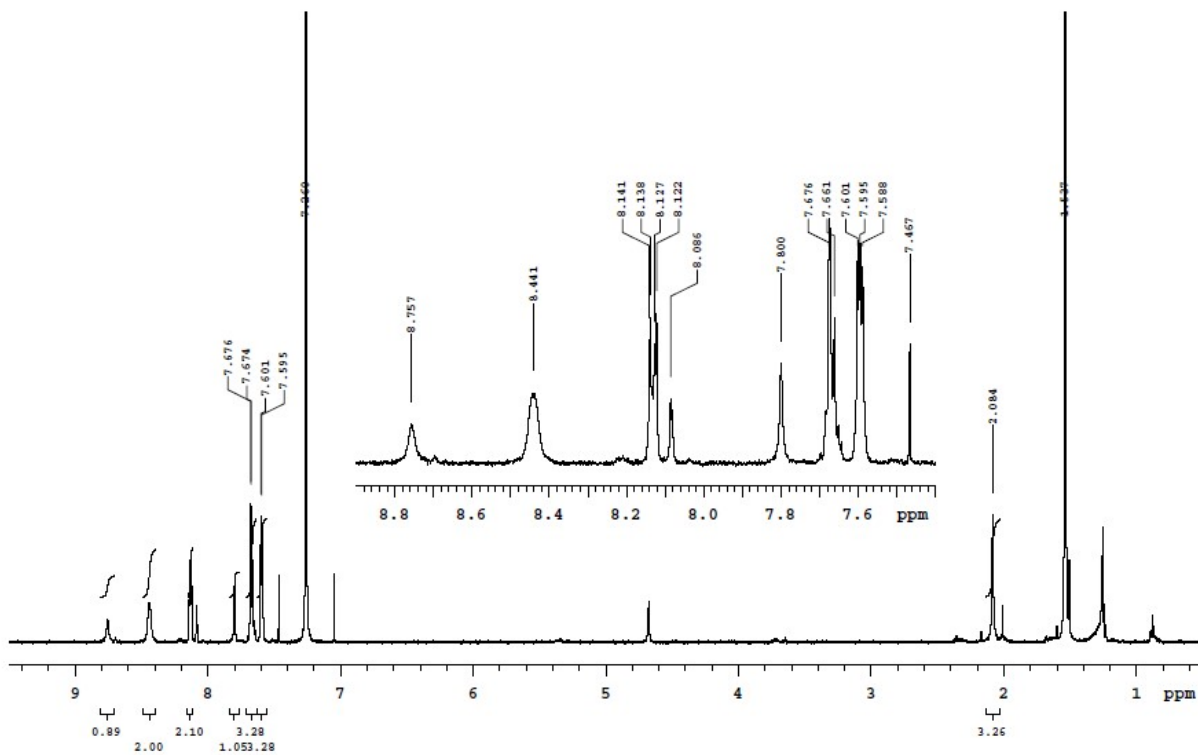

**Fig. S14**  $^1\text{H}$  NMR spectrum of  $[\text{Ru}_2(\text{CO})_4(\mu\text{-OOCCH}_3)_2(\text{dtp})_2]$  (**3**) in  $\text{CDCl}_3$ .

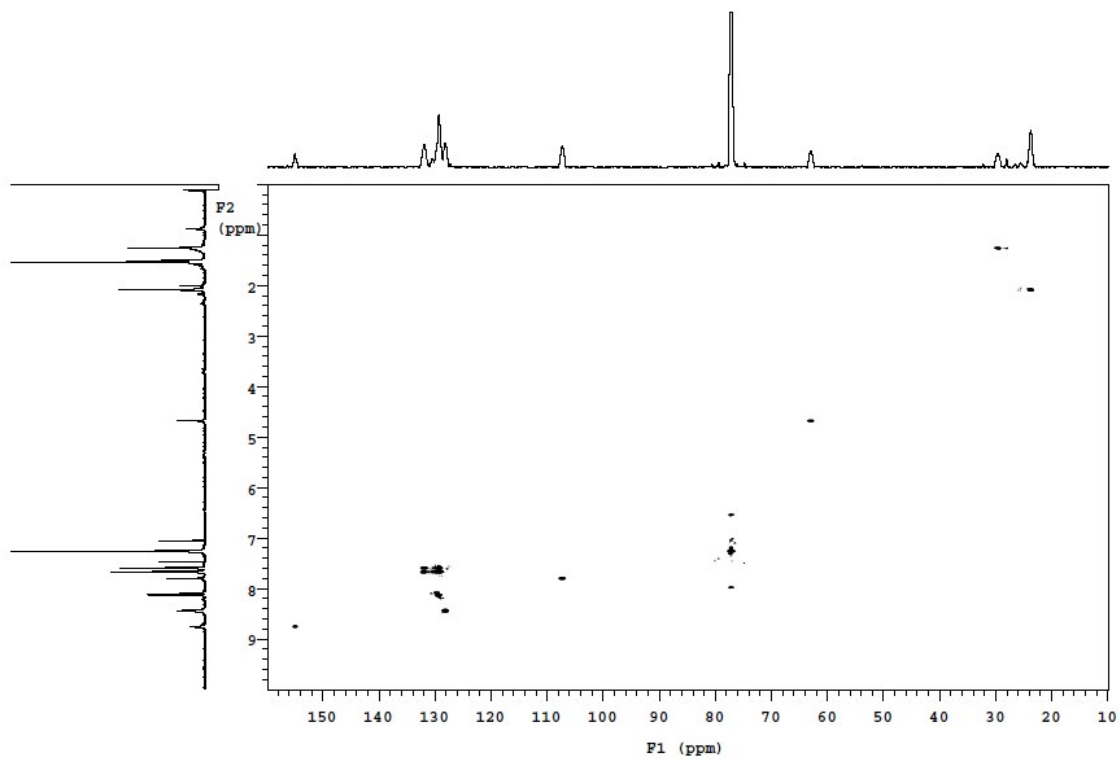

**Fig. S15**  $^1\text{H}$ - $^{13}\text{C}$  HSQC spectrum of  $[\text{Ru}_2(\text{CO})_4(\mu\text{-OOCCH}_3)_2(\text{dtp})_2]$  (**3**) in  $\text{CDCl}_3$ .

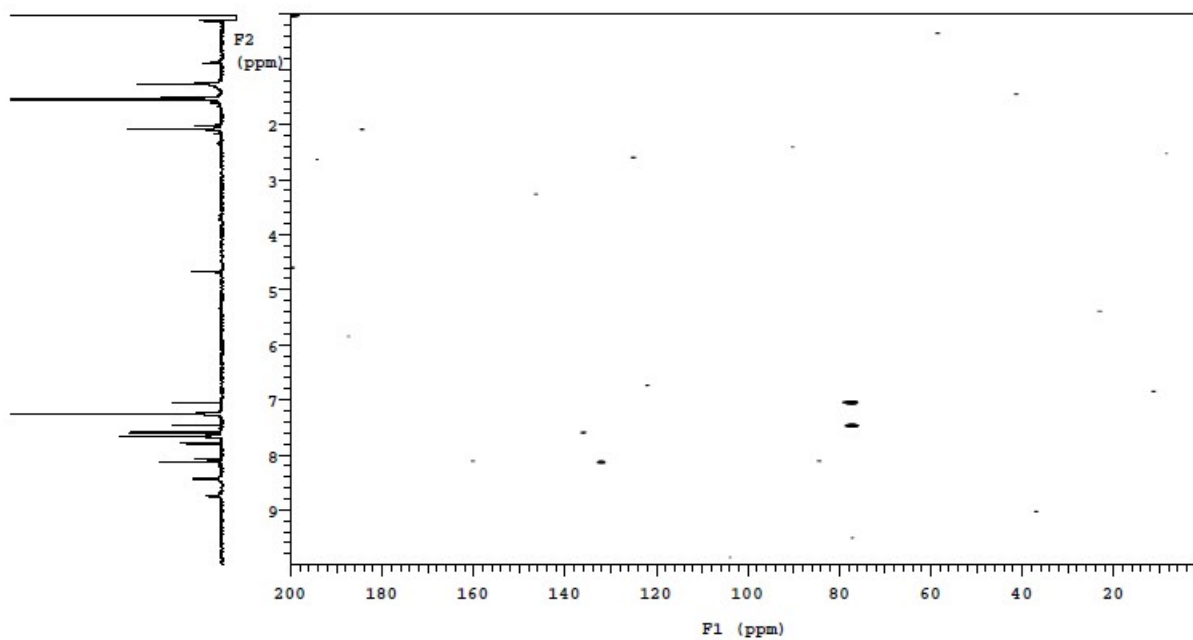

**Fig. S16**  $^1\text{H}$ - $^{13}\text{C}$  HMBC spectrum of  $[\text{Ru}_2(\text{CO})_4(\mu\text{-OOCCH}_3)_2(\text{dtp})_2]$  (**3**) in  $\text{CDCl}_3$ .

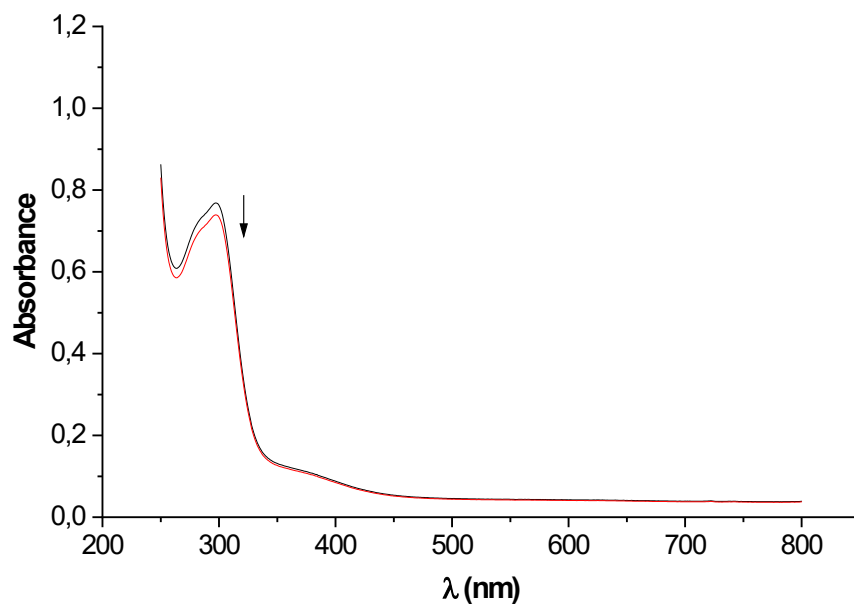

**Fig. S17** The UV-Vis spectra of  $[\text{Ru}_2(\text{CO})_4(\mu\text{-OOCCH}_3)_2(\text{tp})_2]$  (**1**) not irradiated with UV light. Experimental conditions: chloroform,  $[\text{Ru}^I] = 50 \mu\text{mol L}^{-1}$ ,  $t = 0$  min and after  $t = 120$  min in dark.

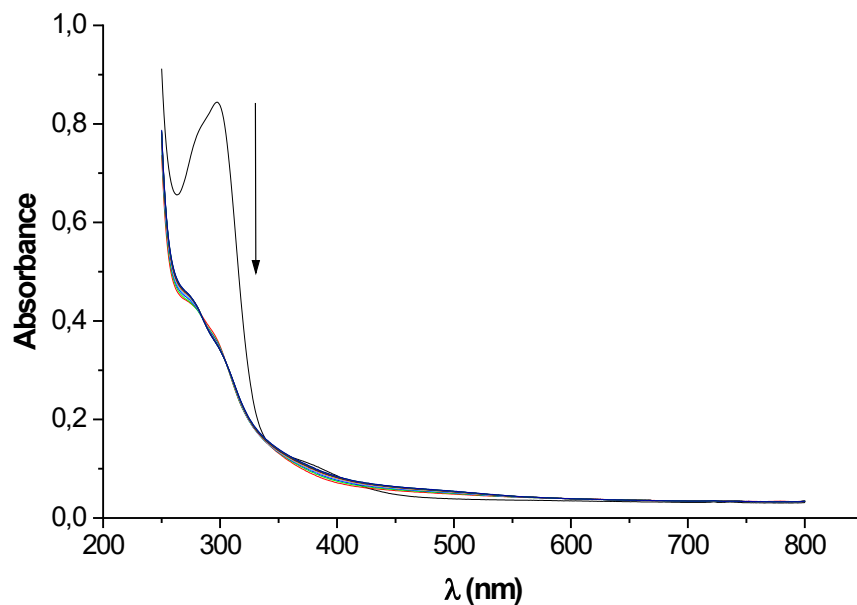

**Fig. S18** The UV-Vis spectra of  $[\text{Ru}_2(\text{CO})_4(\mu\text{-OOCCH}_3)_2(\text{tp})_2]$  (**1**) irradiated with UV light. Experimental conditions: LED lamp,  $\lambda_{\text{irr}} = 254$  nm, chloroform,  $[\text{Ru}^I] = 50 \mu\text{mol L}^{-1}$ ,  $\Delta t = 5$  min,  $t = 0 - 5$  min irradiation,  $t = 5 - 65$  min without irradiation.

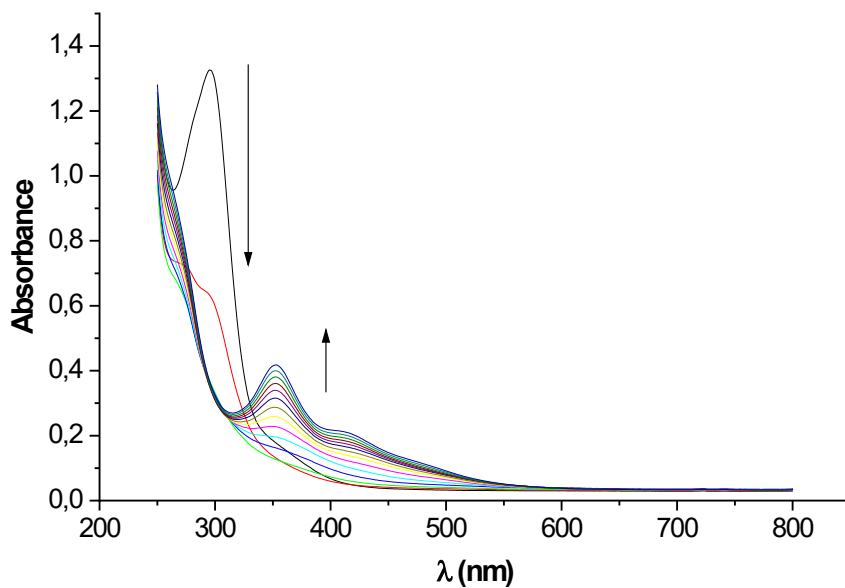

**Fig. S19** The UV-Vis spectra of  $[\text{Ru}_2(\text{CO})_4(\mu\text{-OOCCH}_3)_2(\text{dbtp})_2]$  (**2**) irradiated with UV light. Experimental conditions: LED lamp,  $\lambda_{\text{irr}} = 254 \text{ nm}$ , chloroform,  $[\text{Ru}^{\text{I}}] = 50 \mu\text{mol L}^{-1}$ ,  $\Delta t = 5 \text{ min}$ ,  $t_{\text{total}} = 65 \text{ min}$ .

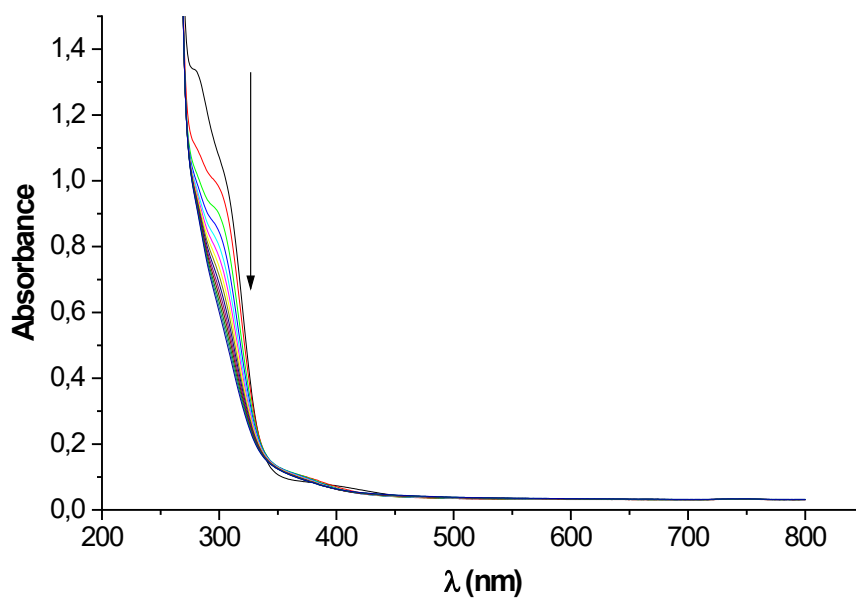

**Fig. S20** The UV-Vis spectra of  $[\text{Ru}_2(\text{CO})_4(\mu\text{-OOCCH}_3)_2(\text{dbtp})_2]$  (**2**) irradiated with UV light. Experimental conditions: LED lamp,  $\lambda_{\text{irr}} = 254 \text{ nm}$ , DMF,  $[\text{Ru}^{\text{I}}] = 50 \mu\text{mol L}^{-1}$ ,  $\Delta t = 5 \text{ min}$ ,  $t_{\text{total}} = 65 \text{ min}$ .

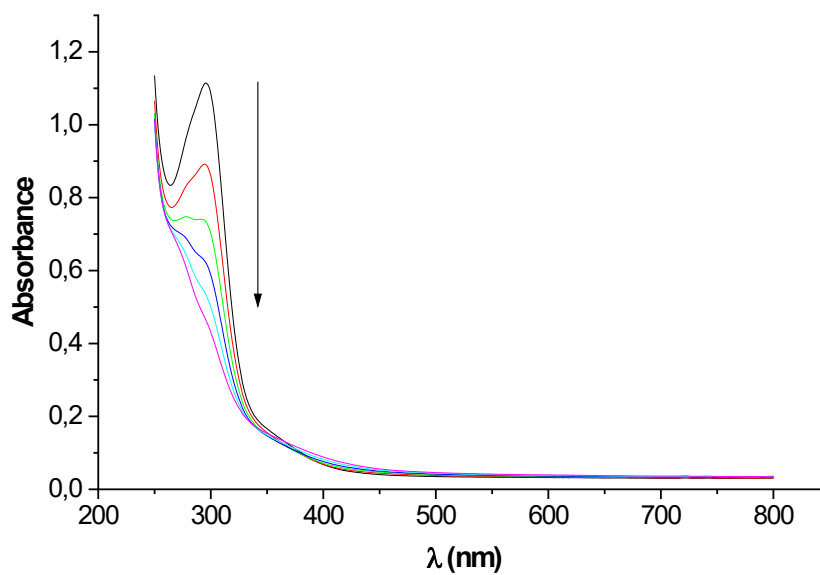

**Fig. S21** The UV-Vis spectra of  $[\text{Ru}_2(\text{CO})_4(\mu\text{-OOCCH}_3)_2(\text{dbtp})_2]$  (**2**) irradiated with near UV light. Experimental conditions: LED lamp,  $\lambda_{\text{irr}} = 365 \text{ nm}$ , chloroform,  $[\text{Ru}^I] = 50 \mu\text{mol L}^{-1}$ ,  $\Delta t = 30 \text{ min}$ ,  $t_{\text{total}} = 150 \text{ min}$ .

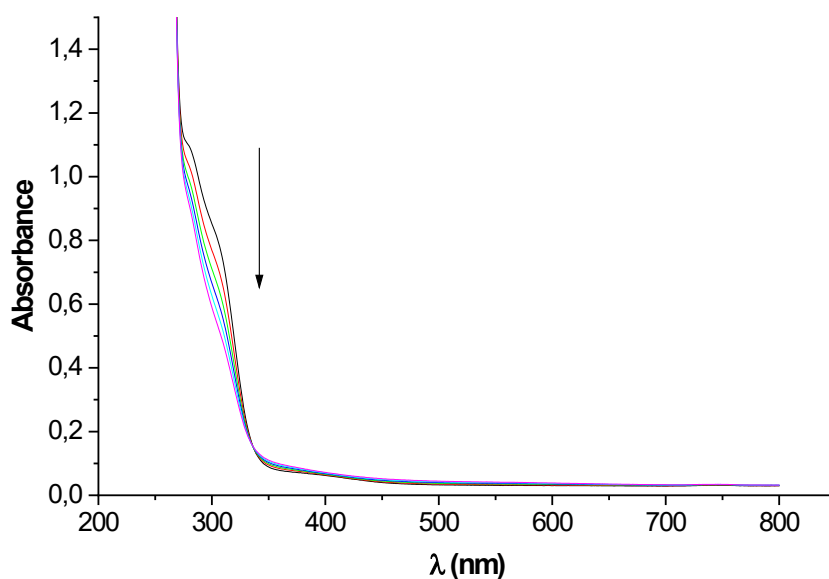

**Fig. S22** The UV-Vis spectra of  $[\text{Ru}_2(\text{CO})_4(\mu\text{-OOCCH}_3)_2(\text{dbtp})_2]$  (**2**) irradiated with near UV light. Experimental conditions: LED lamp,  $\lambda_{\text{irr}} = 365 \text{ nm}$ , DMF,  $[\text{Ru}^I] = 50 \mu\text{mol L}^{-1}$ ,  $\Delta t = 30 \text{ min}$ ,  $t_{\text{total}} = 150 \text{ min}$ .

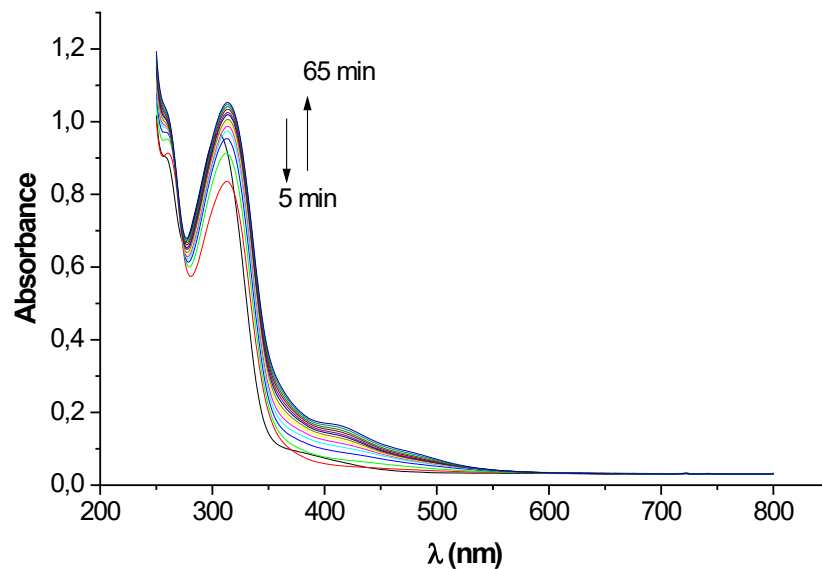

**Fig. S23** The UV-Vis spectra of  $[\text{Ru}_2(\text{CO})_4(\mu\text{-OOCCH}_3)_2(\text{dptp})_2]$  (**3**) irradiated with UV light. Experimental conditions: LED lamp,  $\lambda_{\text{irr}} = 254 \text{ nm}$ , chloroform,  $[\text{Ru}^{\text{I}}] = 25 \mu\text{mol L}^{-1}$ ,  $\Delta t = 5 \text{ min}$ ,  $t_{\text{total}} = 65 \text{ min}$ .

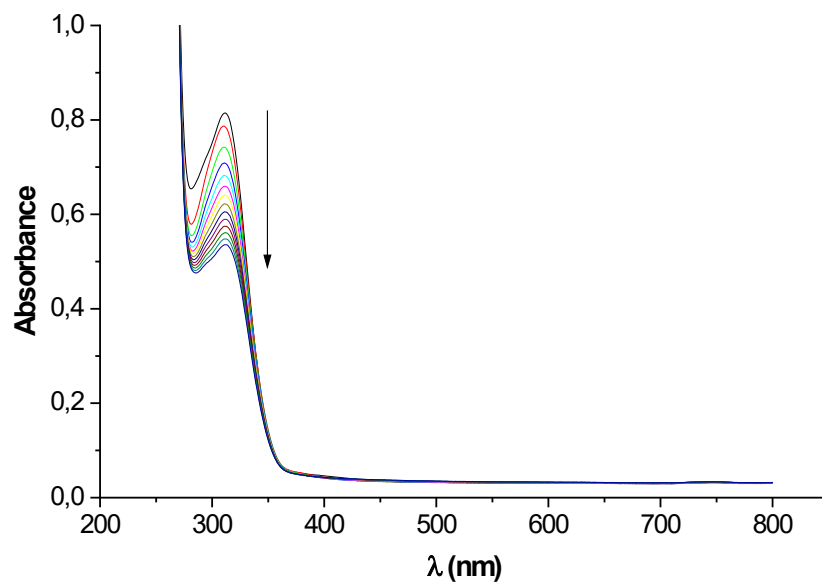

**Fig. S24** The UV-Vis spectra of  $[\text{Ru}_2(\text{CO})_4(\mu\text{-OOCCH}_3)_2(\text{dptp})_2]$  (**3**) irradiated with UV light. Experimental conditions: LED lamp,  $\lambda_{\text{irr}} = 254 \text{ nm}$ , DMF,  $[\text{Ru}^{\text{I}}] = 25 \mu\text{mol L}^{-1}$ ,  $\Delta t = 5 \text{ min}$ ,  $t_{\text{total}} = 65 \text{ min}$ .



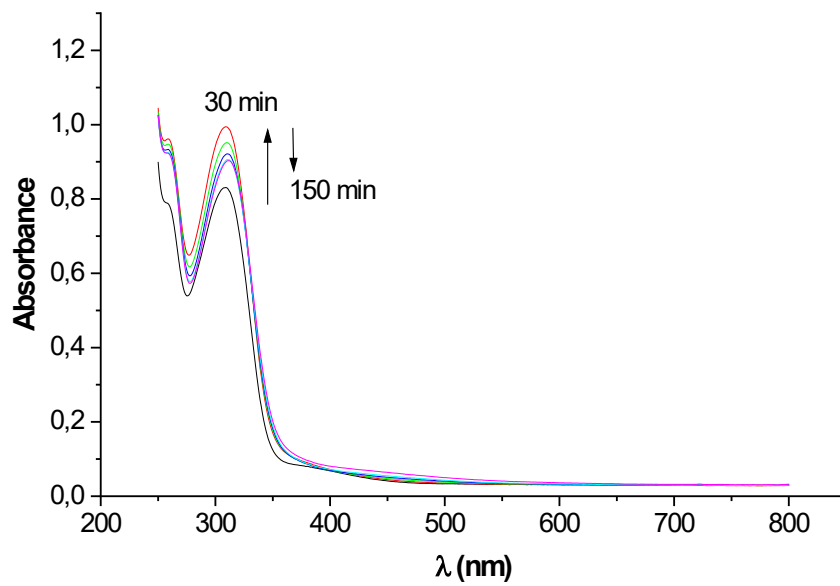

**Fig. S25** The UV-Vis spectra of  $[\text{Ru}_2(\text{CO})_4(\mu\text{-OOCCH}_3)_2(\text{dptp})_2]$  (**3**) irradiated with near UV light. Experimental conditions: LED lamp,  $\lambda_{\text{irr}} = 365 \text{ nm}$ , chloroform,  $[\text{Ru}^I] = 25 \mu\text{mol L}^{-1}$ ,  $\Delta t = 30 \text{ min}$ ,  $t_{\text{total}} = 150 \text{ min}$ .

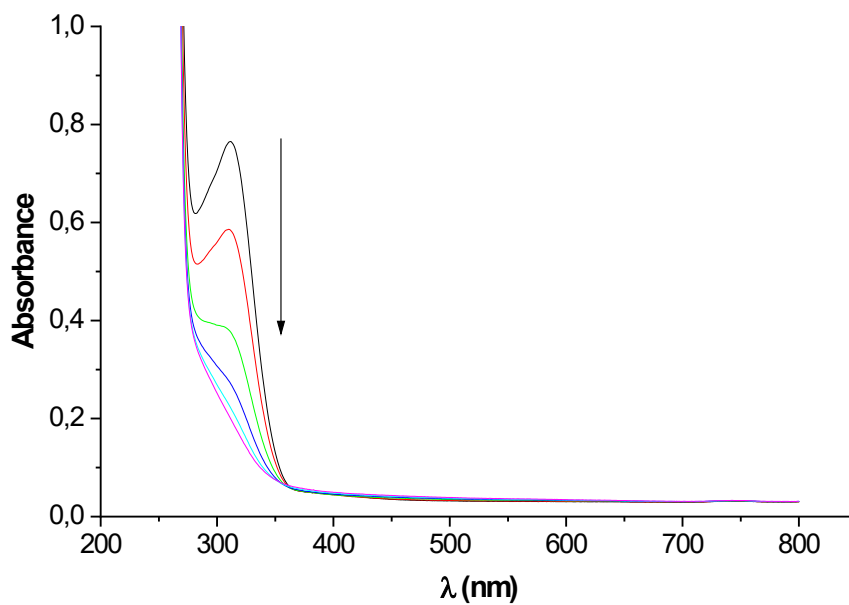

**Fig. S26** The UV-Vis spectra of  $[\text{Ru}_2(\text{CO})_4(\mu\text{-OOCCH}_3)_2(\text{dptp})_2]$  (**3**) irradiated with near UV light. Experimental conditions: LED lamp,  $\lambda_{\text{irr}} = 365 \text{ nm}$ , DMF,  $[\text{Ru}^I] = 25 \mu\text{mol L}^{-1}$ ,  $\Delta t = 30 \text{ min}$ ,  $t_{\text{total}} = 150 \text{ min}$ .

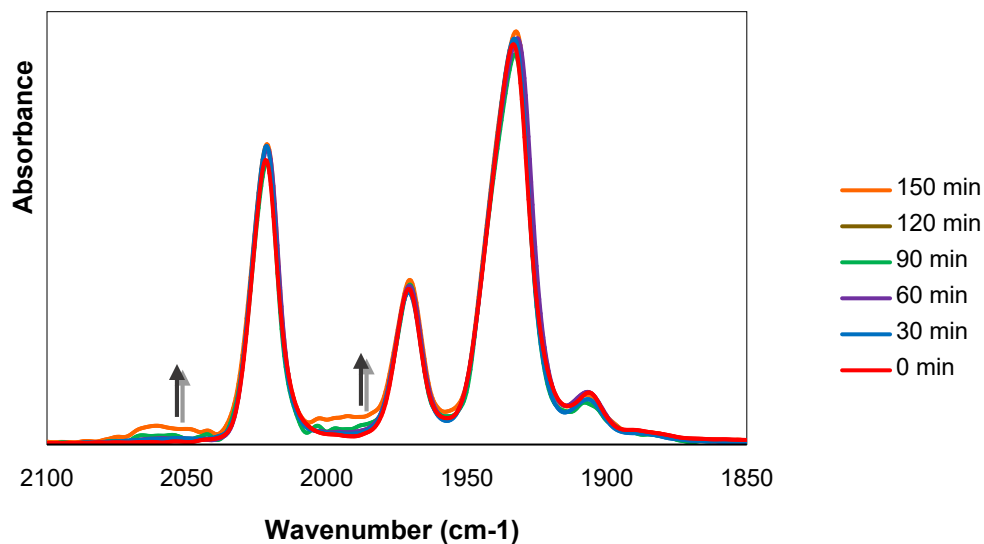

**Fig. S27** FT-IR ( $\nu(\text{CO})$  region) of  $[\text{Ru}_2(\text{CO})_4(\mu\text{-OOCCH}_3)_2(\text{dbtp})_2]$  (**2**) in chloroform and the changes that occur during photolysis. Experimental conditions: LED lamp,  $\lambda_{\text{irr}} = 365 \text{ nm}$ ,  $[\text{Ru}^I] = 0.038 \text{ mol L}^{-1}$ .

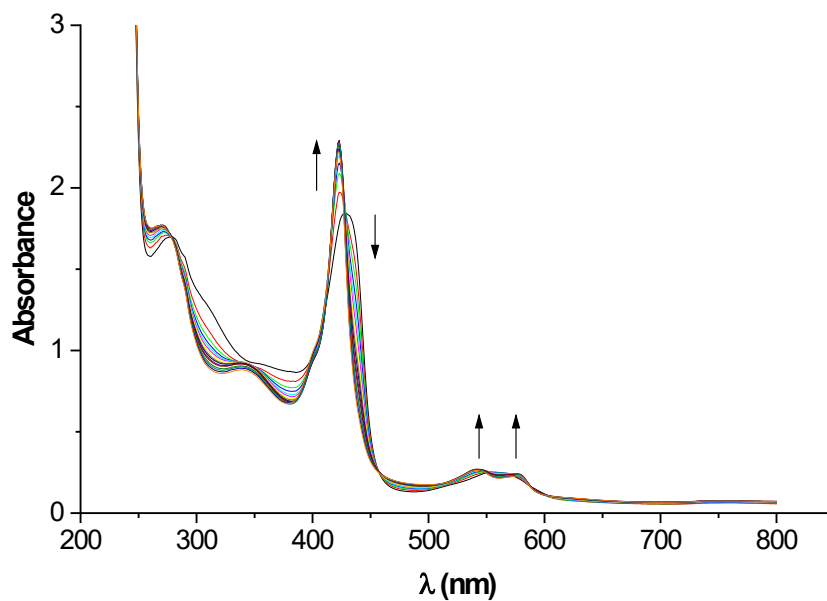

**Fig. S28** The UV-Vis spectra of freshly reduced myoglobin in DMF/phosphate buffer solution pH 7.4 (1:9), after adding the  $[\text{Ru}_2(\text{CO})_4(\mu\text{-OOCCH}_3)_2(\text{tp})_2]$  (**1**) irradiated with UV light. Experimental conditions: LED lamp,  $\lambda_{\text{irr}} = 365 \text{ nm}$ ,  $[\text{Mb}] = 20 \mu\text{mol L}^{-1}$ ,  $[\text{Ru}^I] = 50 \mu\text{mol L}^{-1}$ ,  $\Delta t = 2.5 \text{ min}$ ,  $t_{\text{total}} = 30 \text{ min}$ .

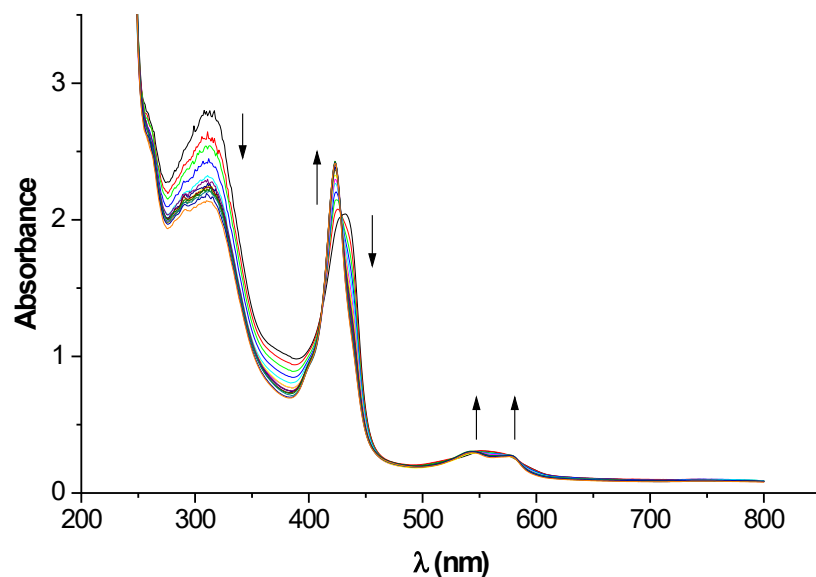

**Fig. S29** The UV-Vis spectra of freshly reduced myoglobin in DMF/phosphate buffer solution pH 7.4 (1:9), after adding the  $[\text{Ru}_2(\text{CO})_4(\mu\text{-OOCCH}_3)_2(\text{dptp})_2]$  (**3**) irradiated with UV light. Experimental conditions: LED lamp,  $\lambda_{\text{irr}} = 365 \text{ nm}$ ,  $[\text{Mb}] = 20 \mu\text{mol L}^{-1}$ ,  $[\text{Ru}^{\text{I}}] = 50 \mu\text{mol L}^{-1}$ ,  $\Delta t = 2.5 \text{ min}$ ,  $t_{\text{total}} = 30 \text{ min}$ .

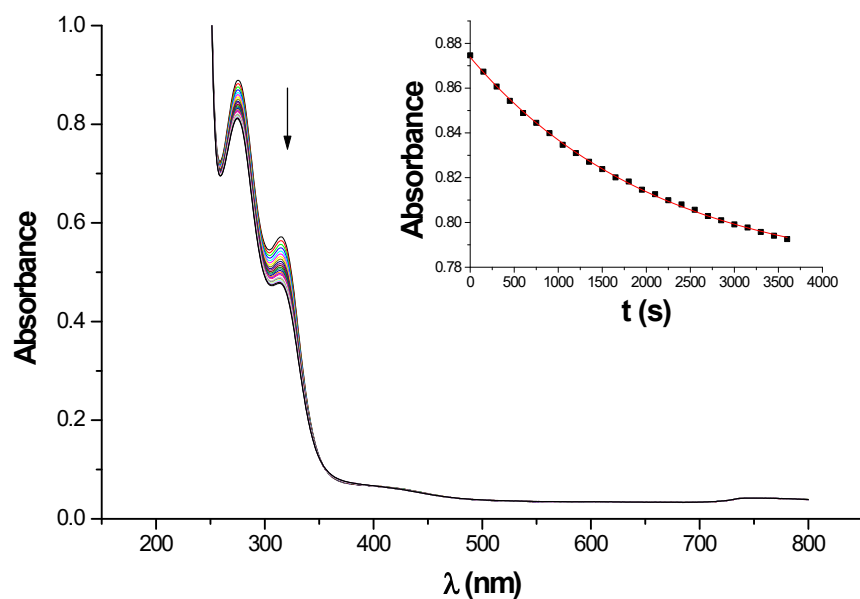

**Fig. S30** The UV-Vis spectra of  $[\text{Ru}_2(\text{CO})_4(\mu\text{-OOCCH}_3)_2(\text{tp})_2]$  (**1**) without UV light irradiation. Experimental conditions:  $\lambda_{\text{obs}} = 280 \text{ nm}$ , DMF : buffer,  $[\text{Ru}^{\text{I}}] = 50 \mu\text{mol L}^{-1}$ ,  $\Delta t = 2.5 \text{ min}$ ,  $t_{\text{total}} = 60 \text{ min}$ , 25 cycles. Inset: the kinetic trace at 278 nm.

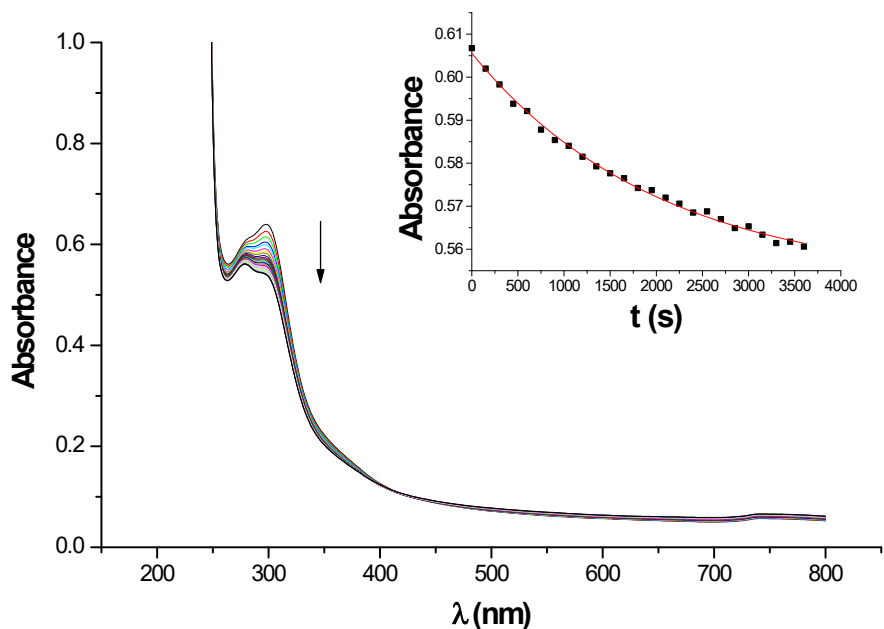

**Fig. S31** The UV-Vis spectra of  $[\text{Ru}_2(\text{CO})_4(\mu\text{-OOCCH}_3)_2(\text{dbtp})_2]$  (**2**) without UV light irradiation. Experimental conditions:  $\lambda_{\text{obs}} = 298 \text{ nm}$ , DMF : buffer,  $[\text{Ru}^{\text{I}}] = 30 \mu\text{mol L}^{-1}$ ,  $\Delta t = 2.5 \text{ min}$ ,  $t_{\text{total}} = 60 \text{ min}$ , 25 cycles. Inset: the kinetic trace at 278 nm.

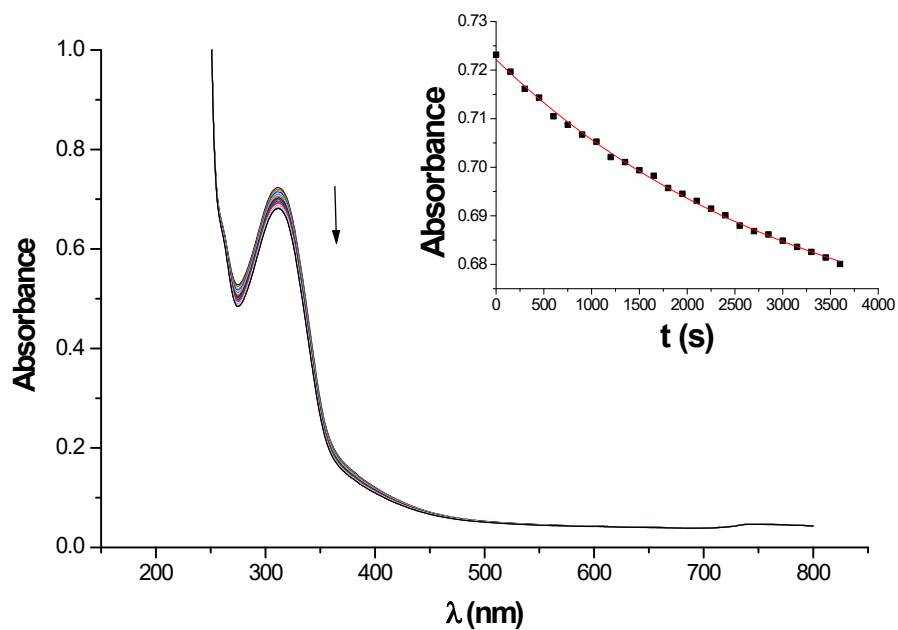

**Fig. S32** The UV-Vis spectra of  $[\text{Ru}_2(\text{CO})_4(\mu\text{-OOCCH}_3)_2(\text{dptp})_2]$  (**3**) without UV light irradiation. Experimental conditions:  $\lambda_{\text{obs}} = 320 \text{ nm}$ , DMF : buffer,  $[\text{Ru}^{\text{I}}] = 20 \mu\text{mol L}^{-1}$ ,  $\Delta t = 2.5 \text{ min}$ ,  $t_{\text{total}} = 60 \text{ min}$ , 25 cycles. Inset: the kinetic trace at 320 nm.

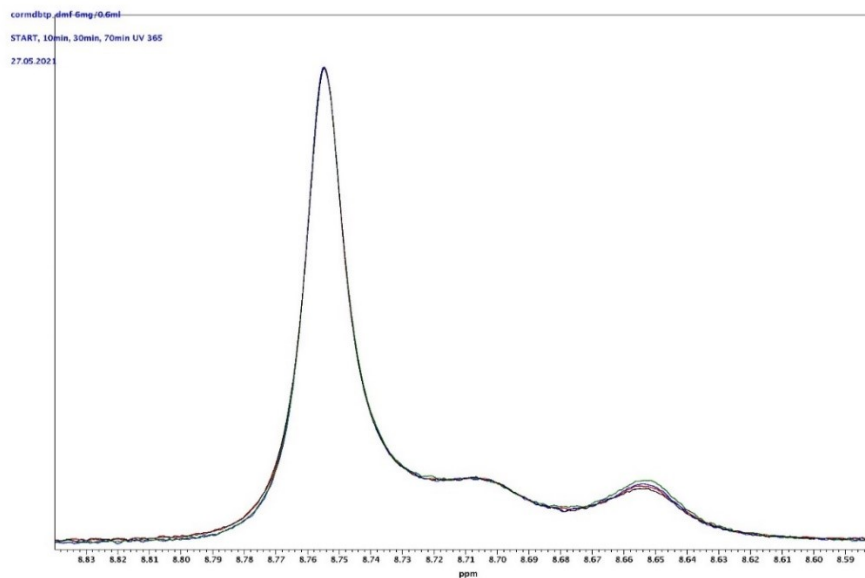

**Fig. S33** Selected range of  $^1\text{H}$  NMR spectra of  $[\text{Ru}_2(\text{CO})_4(\mu\text{-OOCCH}_3)_2(\text{dbtp})_2]$  (**2**) in  $\text{dmf-d}_7$  before and after 10 min, 30 min, and 70 min UV irradiation at 365 nm.

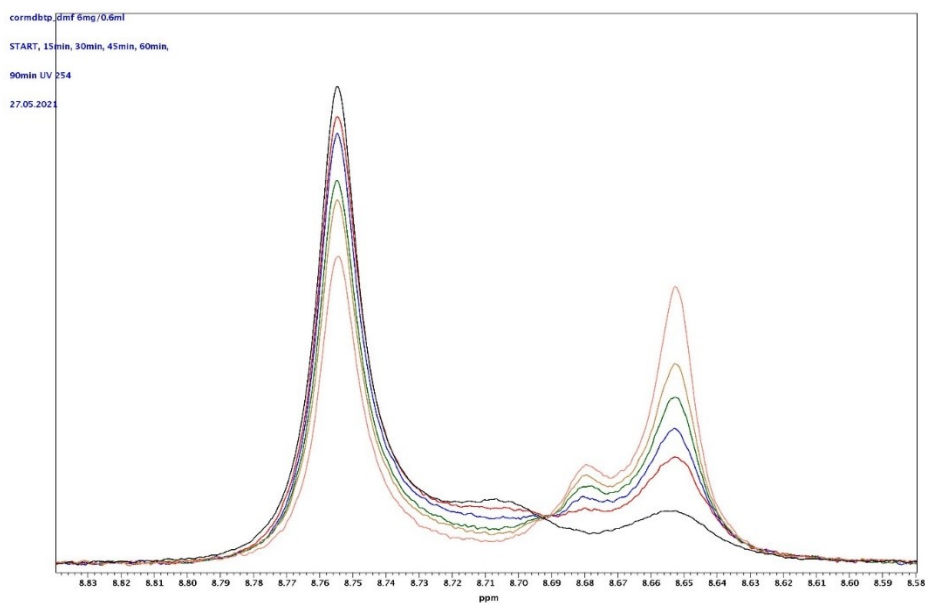

**Fig. S34** Selected range of  $^1\text{H}$  NMR spectra of  $[\text{Ru}_2(\text{CO})_4(\mu\text{-OOCCH}_3)_2(\text{dbtp})_2]$  (**2**) in  $\text{dmf-d}_7$  before and after 15 min, 30 min, 45 min, 60 min, and 90 min UV irradiation at 254 nm.

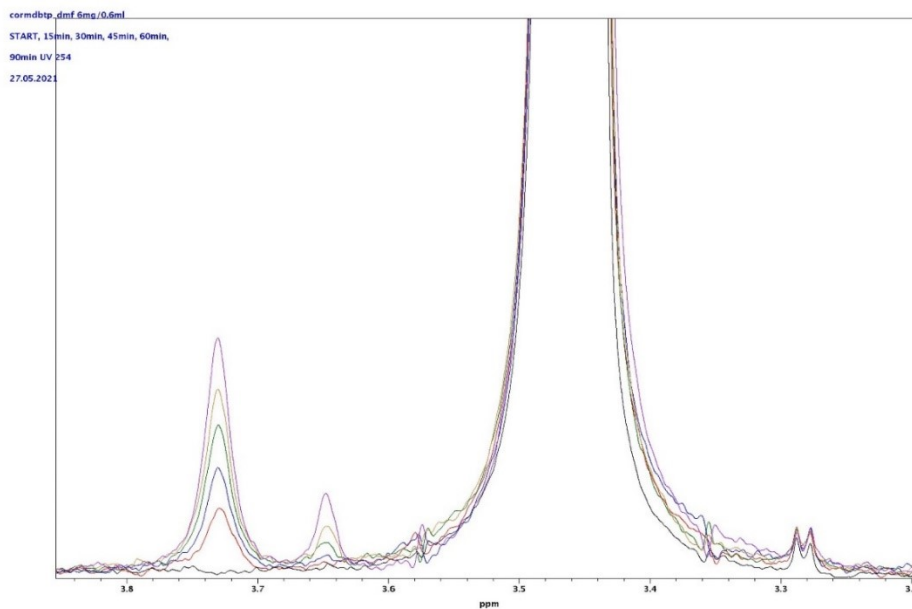

**Fig. S35** Selected range of  $^1\text{H}$  NMR spectra of  $[\text{Ru}_2(\text{CO})_4(\mu\text{-OOCCH}_3)_2(\text{dbtp})_2]$  (**2**) in  $\text{dmf-d}_7$  before and after 15 min, 30 min, 45 min, 60 min, and 90 min UV irradiation at 254 nm.

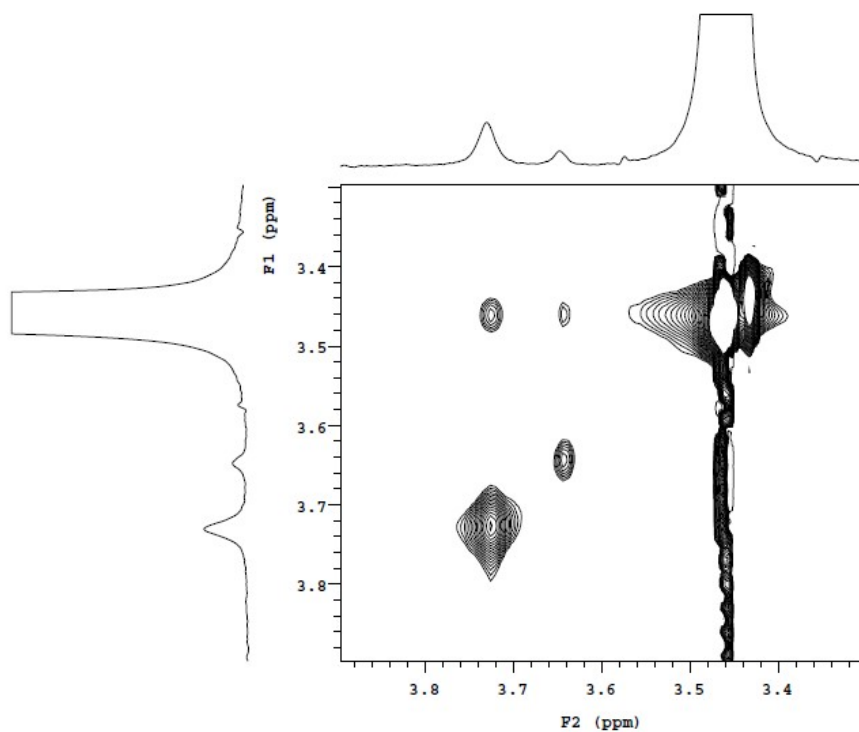

**Fig. S36** Part of the NOESY spectrum of  $[\text{Ru}_2(\text{CO})_4(\mu\text{-OOCCH}_3)_2(\text{dbtp})_2]$  (**2**) in  $\text{dmf-d}_7$  after 90 min UV irradiation at 254 nm.

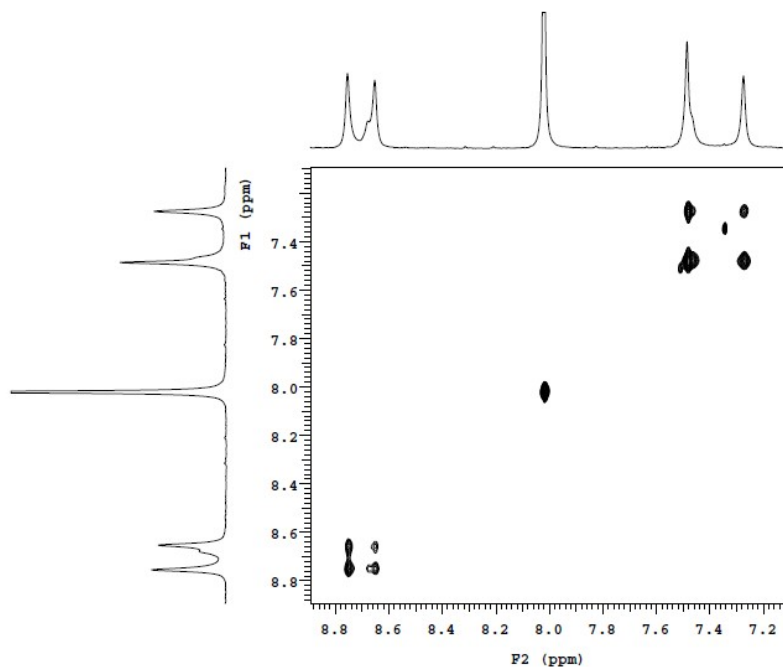

**Fig. S37** Part of the NOESY spectrum of  $[\text{Ru}_2(\text{CO})_4(\mu\text{-OOCCH}_3)_2(\text{dbtp})_2]$  (**2**) in  $\text{dmf-d}_7$  after 90 min UV irradiation at 254 nm.

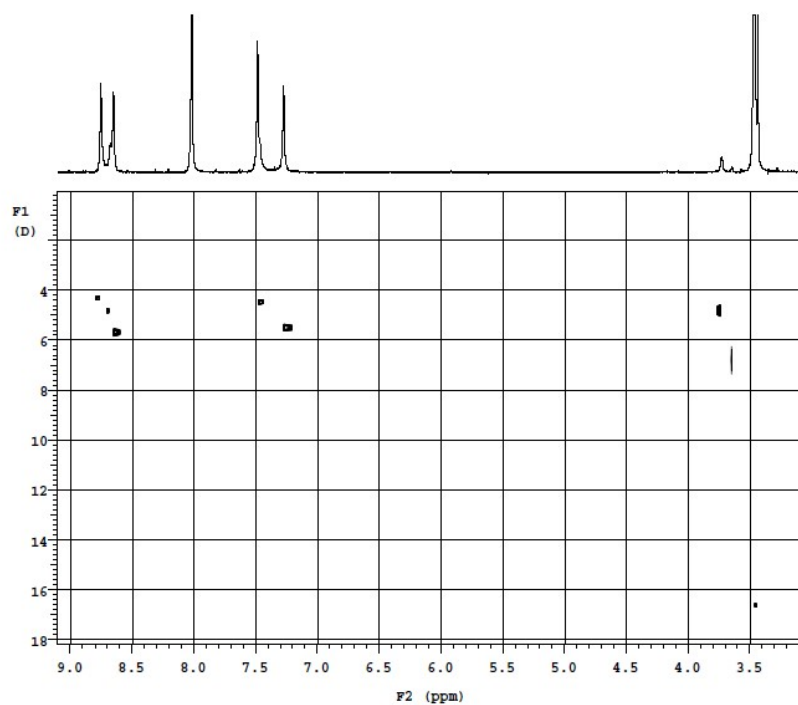

**Fig. S38** Part of the DOSY spectrum of  $[\text{Ru}_2(\text{CO})_4(\mu\text{-OOCCH}_3)_2(\text{dbtp})_2]$  (**2**) in  $\text{dmf-d}_7$  after 90 min UV irradiation at 254 nm.
